# Supplementary material for: Engineering bistetrazoles: (E)-5,5′-(ethene-1,2-diyl)bis(1H-tetrazol-1-ol) as a new planar high-energy-density material
Source: Royal Society of Chemistry journal article supplement (doi:10.1039/d2ma00664b), 2022-01-01
Supplement: d2ma00664b1.pdf [file d2ma00664b1.pdf]

## Electronic Supplementary Information

### Engineering bistetrazaoles: (E)-5,5'-(ethene-1,2-diyl)bis(1H-tetrazol-1-ol) as a new planar high-energy-density material

Jatinder Singh<sup>a</sup>, Richard J. Staples<sup>b</sup>, Jean'ne M. Shreeve<sup>a,\*</sup>

<sup>a</sup> Department of Chemistry, University of Idaho, Moscow, Idaho, 83844-2343, United States.

<sup>b</sup> Department of Chemistry, Michigan State University, East Lansing, Michigan 48824, United States.

#### Table of contents

|                                                           |         |
|-----------------------------------------------------------|---------|
| Isodesmic reactions                                       | S2      |
| Synthesis of compounds <b>3-9</b>                         | S3-S6   |
| References                                                | S7      |
| DSC analysis of compound <b>6</b>                         | S8-S9   |
| D <sub>v</sub> and D <sub>p</sub> of compounds <b>4-9</b> | S9      |
| Crystal structure data                                    | S10-S17 |

## Isodesmic reactions

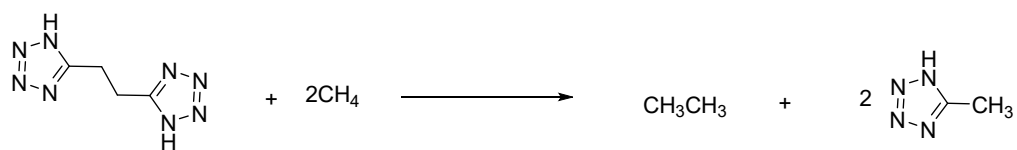

Compound 4

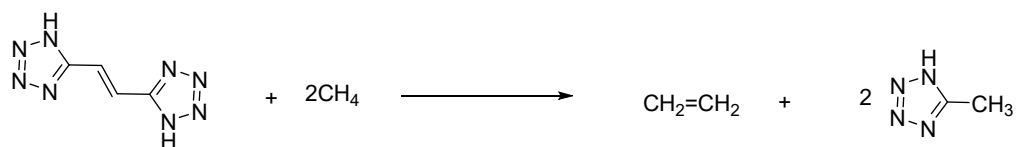

Compound 5

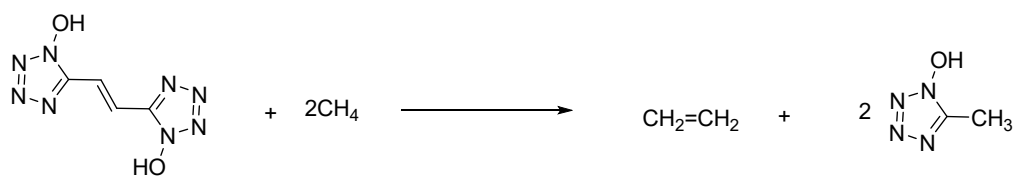

Compound 6

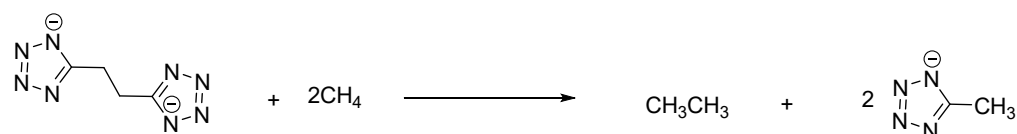

Compound 4<sub>dianion</sub>

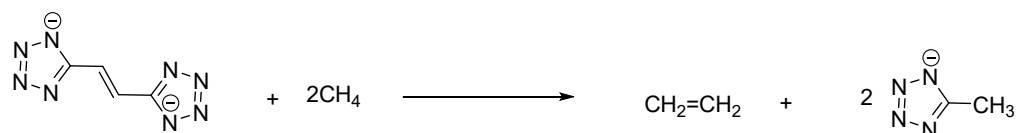

Compound 5<sub>dianion</sub>

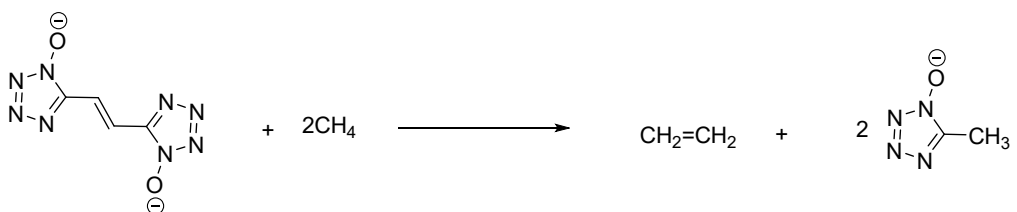

Compound 6<sub>dianion</sub>

**Scheme S1:** Isodesmic reactions for compounds **4**, **5** and **6** and their corresponding dianions.

## Experimental section

All compounds should be synthesized in milligram amounts. The investigated compounds are energetic materials which show increased sensitivities toward various stimuli (e.g., higher temperatures, impact, and friction). Proper safety precautions such as leather gloves, face shield, and eye protection must be worn at all times while synthesizing and handling these materials.

## General methods

All reagents (analytical grade) were purchased from AK Scientific or VWR and were used as supplied.  $^1\text{H}$ ,  $^{13}\text{C}$  NMR and  $^{15}\text{N}$  NMR spectra were recorded using a 500 MHz (Bruker AVANCE 500) NMR spectrometer operating at 500.19, 125.78 MHz, and 50.69 MHz, respectively. Chemical shifts in the  $^1\text{H}$  and  $^{13}\text{C}$  NMR spectra are reported relative to  $\text{Me}_4\text{Si}$  and  $^{15}\text{N}$  NMR spectra to  $\text{MeNO}_2$  as an external standard. The decomposition points (onset temperature) were obtained on a differential scanning calorimeter (TA Instruments Company, Model: Q2000) at a scan rate of  $5\text{ }^\circ\text{C min}^{-1}$ . Infra-red spectra were recorded on a FT-IR spectrometer (Thermo Nicolet AVATAR 370) as thin films using KBr plates. The room temperature densities were measured at  $25\text{ }^\circ\text{C}$  by employing a gas pycnometer (Micromeritics AccuPyc II 1340). The impact and friction sensitivities were determined by using a standard BAM drop hammer and BAM friction tester. Elemental analyses were carried out on a Vario Micro cube Elementar Analyser.

Colorless block-shaped crystals of **6**, **7** and **8** with dimensions  $0.21 \times 0.16 \times 0.05\text{ mm}^3$ ,  $0.14 \times 0.09 \times 0.03\text{ mm}^3$  and  $0.17 \times 0.12 \times 0.07\text{ mm}^3$ , respectively, and colorless cube-shaped crystals of **9** with dimensions  $0.09 \times 0.06 \times 0.03\text{ mm}^3$  were selected and mounted on a nylon loop with Paratone oil on a XtaLAB Synergy, Dualflex, HyPix diffractometer. The crystals were kept at a steady  $T = 100\text{ K}$  during data collection. The structures were solved with the ShelXT<sup>1</sup> solution program using dual methods and by using Olex2.<sup>2</sup> The model was refined with ShelXL<sup>3</sup> using full matrix least squares minimization on  $F^2$ .

## Theoretical study

The HOFs (heat of formation) of compounds **5**, **6** and **7** were calculated by using isodesmic reactions. The single crystal structures were used for the geometric optimization and frequency analyses using the B3LYP functional with the 6-31+G\*\* basis set. The single-point energies were obtained at the MP2/6-311++G\*\* level.<sup>4</sup> The atomization energies for cations were calculated by using the *G<sup>2</sup>ab initio* method.<sup>5</sup> All of the optimized structures were characterized to be true local energy minima on the potential energy surface without imaginary frequencies. In case of the energetic salts, the solid-phase heats of formation were obtained based on a Born–Haber energy cycle.<sup>6</sup> All calculated gas-phase enthalpies for covalent materials are converted to solid phase values by subtracting the empirical heat of sublimation obtained based on Trouton's rule.<sup>7</sup>

## Synthesis of compound 3

Compound **2** (1.00 g, 12.8 mmol) was reacted with hydroxylamine (2 eq., 50% in water) in EtOH for 24h to give the diamidooxime derivative as white crystalline solid. The diamidooxime was dissolved in 6M HCl at 0 °C and NaNO<sub>2</sub> (2.2 eq.) was added while maintaining the temperature below 2 °C. The reaction mixture is stirred for 12h and the resulting mixture was extracted with ethyl acetate to give the dichlorooxime derivative as a white solid. Next, the dichlorooxime derivative was reacted with NaN<sub>3</sub> (2 eq.) in EtOH to give **3** as a white solid. T<sub>d</sub> = 181 °C (onset); <sup>1</sup>H NMR (300 MHz, ppm, d<sub>6</sub>-DMSO): 12.02 (s, 2H), 6.26 (s, 2H); <sup>13</sup>C NMR (75 MHz, ppm, d<sub>6</sub>-DMSO): 154.7, 20.8; Elemental analysis: Calcd (%) for C<sub>4</sub>H<sub>4</sub>N<sub>8</sub>O<sub>2</sub> (196.13): C, 24.50; H, 2.06; N, 57.13; Found: C, 24.78; H, 2.28; N, 57.97.

## Synthesis of compound 4

To a 200 mL round-bottomed flask was added **1** (1.00 g, 12.5 mmol), sodium azide (1.70 g, 26.2 mmol), zinc chloride (0.85 g, 6.2 mmol), and water (30 mL). The reaction mixture was stirred at reflux for 24 h. After cooling, HCl (3M, 20 mL) was added to the reaction mixture with vigorous stirring. The reaction mixture was heated at 50 °C, cooled and extracted with

ethyl acetate (2 x 30 mL). The organic phase was dried over sodium sulfate and the solvent was removed under reduced pressure to obtain **4** as a white solid. Yield: 1.66 g (80%);  $T_d = 253$  °C (onset);  $^1\text{H}$  NMR (300 MHz, ppm,  $d_6$ -DMSO): 3.38 (s, 4H),  $^{13}\text{C}$  NMR (75 MHz, ppm,  $d_6$ -DMSO): 154.7, 20.8; IR ( $\nu$ ,  $\text{cm}^{-1}$ ): 3102, 3043, 2868, 1548, 1428, 1369, 1244, 1213, 1072, 1009, 859, 758; Elemental analysis: Calcd (%) for  $\text{C}_4\text{H}_6\text{N}_8$  (166.14): C, 28.92; H, 3.64; N, 67.44; Found: C, 29.44; H, 3.66; N, 68.07.

### Synthesis of compound 5

To a 200 mL round-bottomed flask was added **2** (1.00 g, 12.8 mmol), sodium azide (1.75 g, 26.9 mmol), zinc chloride (0.87 g, 6.4 mmol), and water (30 mL). The reaction mixture was stirred at reflux for 24 h. After cooling, HCl (3M, 20 mL) was added to the reaction mixture with vigorous stirring. The reaction mixture was heated at 50 °C (until the white solid dissolved) and allowed to cool to room temperature. The crystalline compound was filtered and dried to give **5** as a light-yellow solid. Yield: 1.85 g (88%);  $T_d = 275$  °C (onset);  $^1\text{H}$  NMR (300 MHz, ppm,  $d_6$ -DMSO): 7.66 (s, 2H),  $^{13}\text{C}$  NMR (75 MHz, ppm,  $d_6$ -DMSO): 153.5, 119.5; IR ( $\nu$ ,  $\text{cm}^{-1}$ ): 3158, 3024, 2885, 2762, 2709, 2634, 2496, 1585, 1413, 1260, 1113, 1060, 997, 899, 808, 697; Elemental analysis: Calcd (%) for  $\text{C}_4\text{H}_4\text{N}_8$  (164.13): C, 29.27; H, 2.46; N, 68.27; Found: C 29.15, H 2.54, N 66.70.

### Synthesis of compound 6

Compound **3** (1.0 g, 5.1 mmol) was dissolved in diethyl ether (100 mL). Gaseous HCl was passed through the reaction mixture until saturation was reached at 0–5 °C. The reaction flask was sealed and after stirring overnight at room temperature the solvent was removed. The off-white powder was purified by washing with water (3 x 30 mL) to give **6** as an off-white solid. Yield: 0.90 g (90%);  $T_d = 226$  °C (onset);  $^1\text{H}$  NMR (300 MHz, ppm,  $d_6$ -DMSO): 7.62 (s, 2H),  $^{13}\text{C}$  NMR (75 MHz, ppm,  $d_6$ -DMSO): 144.0, 116.8; IR ( $\nu$ ,  $\text{cm}^{-1}$ ): 3067, 1840, 1582, 1457, 1273,

1203, 966, 775, 699; Elemental analysis: Calcd (%) for C<sub>4</sub>H<sub>4</sub>N<sub>8</sub>O<sub>2</sub> (196.13): C, 24.50; H, 2.06; N, 57.13; Found: C 23.94, H 2.38, N 55.39.

### **General procedure for the synthesis of energetic salts**

Hydroxylamine (2.0 mmol) was added to a suspension of **4**, **5** or **6** (1.0 mmol) in CH<sub>3</sub>CN (50 mL). The reaction mixture was heated to 50 °C and stirred for 30 min. The precipitate was collected by filtration to give the product, which was purified further by washing with CH<sub>3</sub>CN (3 x 10 mL).

**Dihydroxylammonium 5,5'-(ethane-1,2-diyl)ditetrazol-1-ide (7)**: Isolated yield: 88%; T<sub>dec.</sub> (onset) = 255 °C; <sup>1</sup>H NMR (300 MHz, ppm, d<sub>6</sub>-DMSO): 9.22 (bs, 6H), 3.25 (s, 4H); <sup>13</sup>C NMR (75 MHz, ppm, d<sub>6</sub>-DMSO): 157.3, 22.5; IR (ν, cm<sup>-1</sup>): 2978, 2714, 1652, 1541, 1472, 1434, 1411, 1396, 1333, 1281, 1205, 1164, 1146, 1086, 1043, 996, 890, 755, 721, 700; Elemental analysis: Calcd (%) for C<sub>4</sub>H<sub>12</sub>N<sub>10</sub>O<sub>2</sub> (232.20): C, 20.69; H, 5.21; N, 60.32; Found: C 20.87, H 4.36, N 59.82.

**Dihydroxylammonium (E)-5,5'-(ethene-1,2-diyl)ditetrazol-1-ide (8)**: Isolated yield: 91%; T<sub>dec.</sub> (onset) = 288 °C; <sup>1</sup>H NMR (500 MHz, d<sub>6</sub>-DMSO): 8.99 (bs, 6H), 7.47 (s, 2H); <sup>13</sup>C NMR (126 MHz, d<sub>6</sub>-DMSO): 157.1, 118.9; IR (ν, cm<sup>-1</sup>): 2965, 2725, 2152, 1623, 1495, 1399, 1237, 1151, 983, 844, 748; Elemental analysis: Calcd (%) for C<sub>4</sub>H<sub>10</sub>N<sub>10</sub>O<sub>2</sub> (230.19): C, 20.87; H, 4.38; N, 60.85; Found: C 21.18, H 3.75, N 59.75.

**Dihydroxylammonium (E)-5,5'-(ethene-1,2-diyl)bis(1H-tetrazol-1-olate) (9)**: Isolated yield: 93%; T<sub>dec.</sub> (onset) = 230 °C; <sup>1</sup>H NMR (500 MHz, d<sub>6</sub>-DMSO): 10.02 (bs, 6H), 7.72 (s, 2H); <sup>13</sup>C NMR (126 MHz, d<sub>6</sub>-DMSO): 141.5, 114.6; IR (ν, cm<sup>-1</sup>): 2966, 2699, 1608, 1533, 1429, 1308, 1243, 1176, 997, 957, 831, 786, 703; Elemental analysis: Calcd (%) for C<sub>4</sub>H<sub>10</sub>N<sub>10</sub>O<sub>4</sub> (262.19): C, 18.32; H, 3.84; N, 53.42; Found: C 18.24, H 3.91, N 53.23.

## References

1. G. M. Sheldrick, *Acta Crystallogr.*, 2008, **64**, 339–341.
2. G. M. Sheldrick, *Acta Crystallogr.*, 2015, **71**, 3–8.
3. O. V. Dolomanov, L. J. Bourhis, R. J. Gildea, J. A. K. Howard and H. Puschmann, *J. Appl. Crystallogr.*, 2009, **42**, 339–341.
4. R. G. Parr and Y. Weitao, *Density-Functional Theory of Atoms and Molecules*, Oxford University Press: New York, 1995.
5. O. M. Suleimenov and T.-K. Ha, *Chem. Phys. Lett.* 1998, **290**, 451–457.
6. H. D. B. Jenkins, D. Tudela and L. Glasser, *Inorg. Chem.* 2002, **41**, 2364–2367.
7. M. S. Westwell, M. S. Searle, D. J. Wales and D. H. Williams, *J. Am. Chem. Soc.* 1995, **117**, 5013–5015.

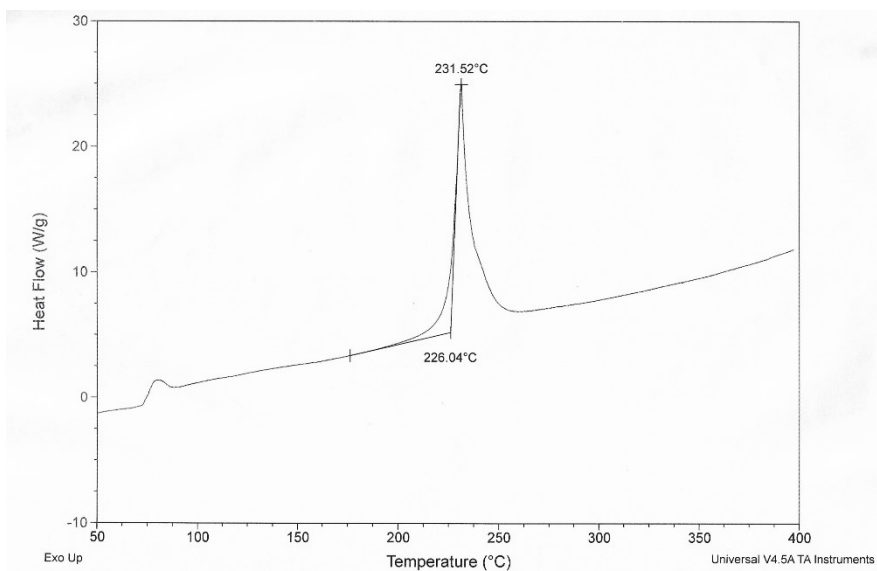

**Figure S1:** DSC analysis of compound 6 at 5 °C/min.

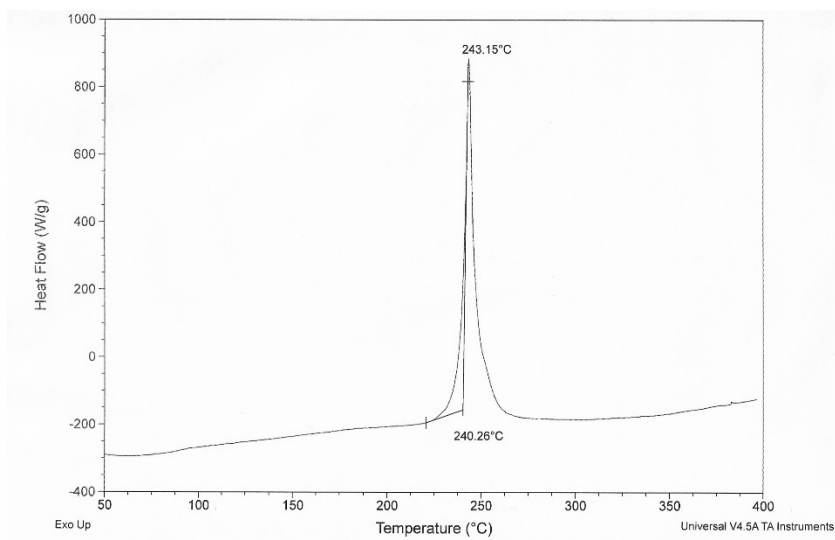

**Figure S2:** DSC analysis of compound 6 at 10 °C/min.



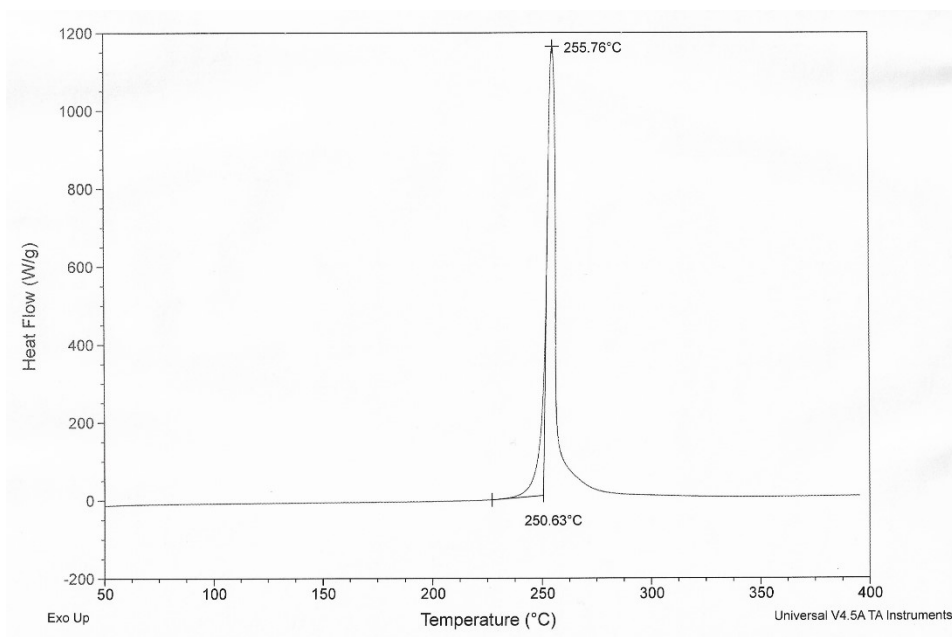

**Figure S3:** DSC analysis of compound **6** at 20 °C/min.

**Table S1:**  $D_v$  and  $D_p$  of compounds **4-9** calculated using EXPLO5 v6.01.

|          | $\rho^a$<br>(g cm <sup>-3</sup> ) | $\Delta H_f^b$<br>(kJmol <sup>-1</sup> )/kJg <sup>-1</sup> | $P^c$<br>(GPa) | $D_v^d$<br>(m s <sup>-1</sup> ) |
|----------|-----------------------------------|------------------------------------------------------------|----------------|---------------------------------|
| <b>4</b> | 1.50                              | 584.2/3.52                                                 | 17.5           | 7309                            |
| <b>5</b> | 1.72                              | 790.9/4.82                                                 | 26.5           | 8466                            |
| <b>6</b> | 1.86                              | 776.9/3.96                                                 | 35.3           | 9230                            |
| <b>7</b> | 1.47                              | 369.2/1.59                                                 | 18.9           | 7595                            |
| <b>8</b> | 1.56                              | 597.7/2.60                                                 | 23.3           | 8146                            |
| <b>9</b> | 1.63                              | 553.3/2.11                                                 | 27.1           | 8499                            |

<sup>a</sup> Density – gas pycnometer at 298 K. <sup>b</sup> Calculated molar enthalpy of formation. <sup>c</sup> Calculated detonation pressure.

<sup>d</sup> Calculated detonation velocity.

## Crystal Structure Data

**Table S2:** Crystal data and structure refinement for compounds **6**, **7**, **8** and **9**.

| Compound                     | <b>6</b>                                                    | <b>7</b>                                                      | <b>8</b>                                                      | <b>9</b>                                                    |
|------------------------------|-------------------------------------------------------------|---------------------------------------------------------------|---------------------------------------------------------------|-------------------------------------------------------------|
| CCDC #                       | 2160643                                                     | 2160646                                                       | 2160645                                                       | 2160644                                                     |
| Formula                      | C <sub>4</sub> H <sub>4</sub> N <sub>8</sub> O <sub>2</sub> | C <sub>4</sub> H <sub>12</sub> N <sub>10</sub> O <sub>2</sub> | C <sub>4</sub> H <sub>10</sub> N <sub>10</sub> O <sub>2</sub> | C <sub>2</sub> H <sub>5</sub> N <sub>5</sub> O <sub>2</sub> |
| $d_{calc.}/\text{g cm}^{-3}$ | 1.905                                                       | 1.506                                                         | 1.585                                                         | 1.668                                                       |
| $\mu/\text{mm}^{-1}$         | 1.377                                                       | 1.057                                                         | 1.121                                                         | 1.269                                                       |
| Formula Weight               | 196.15                                                      | 232.24                                                        | 230.22                                                        | 131.11                                                      |
| Color                        | colorless                                                   | colorless                                                     | colorless                                                     | colorless                                                   |
| Shape                        | block-shaped                                                | block-shaped                                                  | block-shaped                                                  | cube-shaped                                                 |
| Size/mm <sup>3</sup>         | 0.21×0.16×0.05                                              | 0.17×0.12×0.07                                                | 0.14×0.09×0.03                                                | 0.09×0.06×0.03                                              |
| $T/\text{K}$                 | 99.99(10)                                                   | 100.00(10)                                                    | 100.00(10)                                                    | 100(2)                                                      |
| Crystal System               | tetragonal                                                  | orthorhombic                                                  | triclinic                                                     | monoclinic                                                  |
| Flack Parameter              | -0.1(2)                                                     | 0.11(9)                                                       | -                                                             | -                                                           |
| Hooft Parameter              | -0.1(2)                                                     | 0.09(6)                                                       | -                                                             | -                                                           |
| Space Group                  | <i>I4<sub>1</sub>cd</i>                                     | <i>Ima2</i>                                                   | <i>P</i> -1                                                   | <i>P2<sub>1</sub>/c</i>                                     |
| $a/\text{Å}$                 | 10.60713(10)                                                | 7.45690(10)                                                   | 4.3728(2)                                                     | 6.9233(2)                                                   |
| $b/\text{Å}$                 | 10.60713(10)                                                | 17.0704(2)                                                    | 7.3072(4)                                                     | 10.6988(3)                                                  |
| $c/\text{Å}$                 | 12.1560(2)                                                  | 8.04400(10)                                                   | 8.3883(4)                                                     | 7.0551(2)                                                   |
| $\alpha/^\circ$              | 90                                                          | 90                                                            | 66.474(5)                                                     | 90                                                          |
| $\beta/^\circ$               | 90                                                          | 90                                                            | 81.732(4)                                                     | 92.465(3)                                                   |
| $\gamma/^\circ$              | 90                                                          | 90                                                            | 79.997(4)                                                     | 90                                                          |
| $V/\text{Å}^3$               | 1367.69(4)                                                  | 1023.94(2)                                                    | 241.19(2)                                                     | 522.10(3)                                                   |
| $Z$                          | 8                                                           | 4                                                             | 1                                                             | 4                                                           |
| $Z'$                         | 0.5                                                         | 0.5                                                           | 0.5                                                           | 1                                                           |
| Wavelength/Å                 | 1.54184                                                     | 1.54184                                                       | 1.54184                                                       | 1.54184                                                     |
| Radiation type               | Cu K $_{\alpha}$                                            | Cu K $_{\alpha}$                                              | Cu K $_{\alpha}$                                              | Cu K $_{\alpha}$                                            |
| $\theta_{min}/^\circ$        | 8.358                                                       | 5.182                                                         | 5.772                                                         | 6.399                                                       |
| $\theta_{max}/^\circ$        | 76.324                                                      | 77.305                                                        | 76.203                                                        | 76.915                                                      |
| Measured Refl's.             | 6016                                                        | 5541                                                          | 2089                                                          | 2902                                                        |
| Indep't Refl's               | 703                                                         | 1083                                                          | 947                                                           | 1010                                                        |
| Refl's $I \geq 2 \sigma(I)$  | 683                                                         | 1077                                                          | 861                                                           | 914                                                         |
| $R_{int}$                    | 0.0369                                                      | 0.0237                                                        | 0.0270                                                        | 0.0270                                                      |
| Parameters                   | 66                                                          | 124                                                           | 89                                                            | 102                                                         |
| Restraints                   | 1                                                           | 1                                                             | 0                                                             | 0                                                           |
| Largest Peak                 | 0.55                                                        | 0.227                                                         | 0.291                                                         | 0.456                                                       |
| Deepest Hole                 | -0.31                                                       | -0.145                                                        | -0.271                                                        | -0.194                                                      |
| GooF                         | 1.169                                                       | 1.087                                                         | 1.094                                                         | 1.056                                                       |
| $wR_2$ (all data)            | 0.1058                                                      | 0.0549                                                        | 0.0976                                                        | 0.1006                                                      |
| $wR_2$                       | 0.1064                                                      | 0.0548                                                        | 0.0949                                                        | 0.0972                                                      |
| $R_1$ (all data)             | 0.0384                                                      | 0.0209                                                        | 0.0386                                                        | 0.0401                                                      |
| $R_1$                        | 0.0369                                                      | 0.0208                                                        | 0.0359                                                        | 0.0365                                                      |

**Table S3:** Bond Lengths in Å for **6**.

| Atom | Atom            | Length/Å |
|------|-----------------|----------|
| O1   | N1              | 1.300(3) |
| N1   | N2              | 1.354(4) |
| N1   | C1              | 1.340(4) |
| N2   | N3              | 1.298(3) |
| N3   | N4              | 1.341(3) |
| N4   | C1              | 1.350(3) |
| C1   | C2              | 1.437(4) |
| C2   | C2 <sup>1</sup> | 1.341(5) |

 ${}^1-2-X, -1-Y, +Z$ 
**Table S4:** Bond Angles in ° for **6**.

| Atom            | Atom | Atom | Angle/°  |
|-----------------|------|------|----------|
| O1              | N1   | N2   | 121.3(2) |
| O1              | N1   | C1   | 128.6(2) |
| C1              | N1   | N2   | 110.1(2) |
| N3              | N2   | N1   | 107.6(2) |
| N2              | N3   | N4   | 107.9(2) |
| N3              | N4   | C1   | 110.3(2) |
| N1              | C1   | N4   | 104.1(2) |
| N1              | C1   | C2   | 128.7(2) |
| N4              | C1   | C2   | 127.3(2) |
| C2 <sup>1</sup> | C2   | C1   | 122.8(3) |

 ${}^1-2-X, -1-Y, +Z$ 
**Table S5:** Torsion Angles in ° for **6**.

| A  | B  | C  | D               | Angle/°   |
|----|----|----|-----------------|-----------|
| O1 | N1 | N2 | N3              | 179.9(6)  |
| O1 | N1 | C1 | N4              | 179.6(6)  |
| O1 | N1 | C1 | C2              | 1.0(9)    |
| N1 | N2 | N3 | N4              | 0.2(7)    |
| N1 | C1 | C2 | C2 <sup>1</sup> | -0.8(7)   |
| N2 | N1 | C1 | N4              | -1.4(6)   |
| N2 | N1 | C1 | C2              | 180.0(5)  |
| N2 | N3 | N4 | C1              | -1.1(9)   |
| N3 | N4 | C1 | N1              | 1.6(8)    |
| N3 | N4 | C1 | C2              | -179.8(5) |
| N4 | C1 | C2 | C2 <sup>1</sup> | -179.1(5) |
| C1 | N1 | N2 | N3              | 0.8(6)    |

<sup>1</sup>-2-X,-1-Y,+Z

**Table S6:** Hydrogen Bonds for **6**.

| D  | H  | A               | d(D-H)/Å | d(H-A)/Å | d(D-A)/Å | D-H-A/° |
|----|----|-----------------|----------|----------|----------|---------|
| C2 | H2 | O1 <sup>1</sup> | 0.95     | 2.29     | 2.962(3) | 127.5   |

<sup>1</sup>-2-X,-1-Y,+Z

**Table S7:** Bond Lengths in Å for **7**.

| Atom | Atom            | Length/Å |
|------|-----------------|----------|
| N1   | N2              | 1.342(3) |
| N1   | C1              | 1.323(3) |
| N2   | N3              | 1.293(3) |
| N3   | N4              | 1.349(3) |
| N4   | C1              | 1.329(3) |
| N5   | N6              | 1.345(2) |
| N5   | C4              | 1.331(2) |
| N6   | N6 <sup>1</sup> | 1.308(2) |
| C1   | C2              | 1.498(3) |
| C2   | C3              | 1.527(3) |
| C3   | C4              | 1.501(3) |
| O1   | N7              | 1.420(2) |
| O2   | N8 <sup>1</sup> | 1.496(2) |
| O2   | N8              | 1.496(2) |
| N8   | N8 <sup>2</sup> | 1.393(4) |

<sup>1</sup>3/2-x,+y,+z; <sup>2</sup>2-x,1-y,+z

**Table S8:** Bond Angles in ° for **7**.

| Atom            | Atom | Atom            | Angle/°   |
|-----------------|------|-----------------|-----------|
| C1              | N1   | N2              | 106.14(2) |
| N3              | N2   | N1              | 108.83(2) |
| N2              | N3   | N4              | 109.5(2)  |
| C1              | N4   | N3              | 105.17(2) |
| C4              | N5   | N6              | 105.16(1) |
| N6 <sup>1</sup> | N6   | N5              | 109.26(7) |
| N1              | C1   | N4              | 110.34(2) |
| N1              | C1   | C2              | 123.89(2) |
| N4              | C1   | C2              | 125.77(2) |
| C1              | C2   | C3              | 113.15(2) |
| C4              | C3   | C2              | 110.39(2) |
| N5 <sup>1</sup> | C4   | N5              | 111.15(2) |
| N5 <sup>1</sup> | C4   | C3              | 124.40(8) |
| N5              | C4   | C3              | 124.40(8) |
| N8              | O2   | N8 <sup>1</sup> | 111.7(2)  |

| Atom            | Atom | Atom | Angle <sup>°</sup> |
|-----------------|------|------|--------------------|
| N8 <sup>2</sup> | N8   | O2   | 154.74(1)          |

<sup>1</sup>3/2-x,+y,+z; <sup>2</sup>2-x,1-y,+z

**Table S9:** Torsion Angles in ° for **7**.

| Atom            | Atom | Atom | Atom            | Angle <sup>°</sup> |
|-----------------|------|------|-----------------|--------------------|
| N1              | N2   | N3   | N4              | 0.000(1)           |
| N1              | C1   | C2   | C3              | 180.000(1)         |
| N2              | N1   | C1   | N4              | 0.000(1)           |
| N2              | N1   | C1   | C2              | 180.000(1)         |
| N2              | N3   | N4   | C1              | 0.000(1)           |
| N3              | N4   | C1   | N1              | 0.000(1)           |
| N3              | N4   | C1   | C2              | 180.000(1)         |
| N4              | C1   | C2   | C3              | 0.000(1)           |
| N6              | N5   | C4   | N5 <sup>1</sup> | 0.6(2)             |
| N6              | N5   | C4   | C3              | 178.00(2)          |
| C1              | N1   | N2   | N3              | 0.000(1)           |
| C1              | C2   | C3   | C4              | 180.000(1)         |
| C2              | C3   | C4   | N5              | -88.55(2)          |
| C2              | C3   | C4   | N5 <sup>1</sup> | 88.55(2)           |
| C4              | N5   | N6   | N6 <sup>1</sup> | -0.34(1)           |
| N8 <sup>1</sup> | O2   | N8   | N8 <sup>2</sup> | 128.8(5)           |

<sup>1</sup>3/2-x,+y,+z; <sup>2</sup>2-x,1-y,+z

**Table S10:** Hydrogen Fractional Atomic Coordinates ( $\times 10^4$ ) and Equivalent Isotropic Displacement Parameters ( $\text{\AA}^2 \times 10^3$ ) for **7**  $U_{eq}$  is defined as 1/3 of the trace of the orthogonalised  $U_{ij}$ .

| Atom | x         | y        | z        | $U_{eq}$ |
|------|-----------|----------|----------|----------|
| H2   | 6430(30)  | 6299(11) | 5200(30) | 22(5)    |
| H3   | 8560(30)  | 6463(12) | 8140(30) | 34(6)    |
| H1   | 7500      | 1650(30) | 3570(50) | 52(11)   |
| H7A  | 7500      | 3150(20) | 3900(40) | 21(7)    |
| H7B  | 6480(30)  | 2786(11) | 2610(30) | 19(5)    |
| H2A  | 7500      | 4640(20) | 2600(50) | 38(9)    |
| H8A  | 10380(40) | 4580(14) | 1060(40) | 61(8)    |
| H8B  | 8750(50)  | 4860(20) | -380(50) | 24(11)   |

**Table S11:** Bond Lengths in Å for **8**.

| Atom | Atom            | Length/Å  |
|------|-----------------|-----------|
| N1   | N2              | 1.3407(2) |
| N1   | C1              | 1.3440(2) |
| N2   | N3              | 1.3116(2) |
| N3   | N4              | 1.3504(2) |
| N4   | C1              | 1.3382(2) |
| C1   | C2              | 1.4561(2) |
| C2   | C2 <sup>1</sup> | 1.337(3)  |
| O1   | N5              | 1.4197(2) |

<sup>1</sup>-x,-y,1-z

**Table S12:** Bond Angles in ° for **8**.

| Atom            | Atom | Atom | Angle/°    |
|-----------------|------|------|------------|
| N2              | N1   | C1   | 105.16(11) |
| N3              | N2   | N1   | 109.65(11) |
| N2              | N3   | N4   | 109.28(10) |
| C1              | N4   | N3   | 105.07(11) |
| N1              | C1   | C2   | 125.13(12) |
| N4              | C1   | N1   | 110.84(12) |
| N4              | C1   | C2   | 124.01(12) |
| C2 <sup>1</sup> | C2   | C1   | 122.76(16) |

<sup>1</sup>-x,-y,1-z

**Table S13:** Torsion Angles in ° for **8**.

| Atom | Atom | Atom | Atom            | Angle/°     |
|------|------|------|-----------------|-------------|
| N1   | N2   | N3   | N4              | -0.34(14)   |
| N1   | C1   | C2   | C2 <sup>1</sup> | -3.2(2)     |
| N2   | N1   | C1   | N4              | -0.84(14)   |
| N2   | N1   | C1   | C2              | 177.43(12)  |
| N2   | N3   | N4   | C1              | -0.18(14)   |
| N3   | N4   | C1   | N1              | 0.64(14)    |
| N3   | N4   | C1   | C2              | -177.65(12) |
| N4   | C1   | C2   | C2 <sup>1</sup> | 174.80(15)  |
| C1   | N1   | N2   | N3              | 0.71(14)    |

<sup>1</sup>-x,-y,1-z

**Table S14:** Hydrogen Fractional Atomic Coordinates ( $\times 10^4$ ) and Equivalent Isotropic Displacement Parameters ( $\text{\AA}^2 \times 10^3$ ) for **8**.  $U_{eq}$  is defined as 1/3 of the trace of the orthogonalised  $U_{ij}$ .

| Atom | x         | y        | z        | $U_{eq}$ |
|------|-----------|----------|----------|----------|
| H2   | 761.47    | -1527.34 | 4349.99  | 15       |
| H1   | 970(50)   | 5020(40) | 3190(30) | 41(6)    |
| H5A  | -3080(40) | 8050(30) | 1660(20) | 22(4)    |
| H5B  | -220(50)  | 7300(30) | 700(30)  | 22(5)    |
| H5C  | -2700(50) | 5930(30) | 1540(30) | 27(5)    |

**Table S15:** Hydrogen Bond information for **8**.

| D  | H   | A               | d(D-H)/\AA | d(H-A)/\AA | d(D-A)/\AA | D-H-A/deg |
|----|-----|-----------------|------------|------------|------------|-----------|
| O1 | H1  | N1              | 0.89(3)    | 1.80(3)    | 2.6905(15) | 177(2)    |
| N5 | H5A | N4 <sup>1</sup> | 0.96(2)    | 1.90(2)    | 2.8374(16) | 164.2(17) |
| N5 | H5B | N3 <sup>2</sup> | 0.91(2)    | 1.98(2)    | 2.8938(17) | 175.0(17) |
| N5 | H5C | N2 <sup>3</sup> | 0.92(2)    | 1.99(2)    | 2.8983(17) | 167.4(18) |

<sup>1</sup>-1+x,1+y,+z; <sup>2</sup>1-x,1-y,-z; <sup>3</sup>-1+x,+y,+z

**Table S16:** Bond Lengths in \AA for **9**.

| Atom | Atom            | Length/\AA |
|------|-----------------|------------|
| O1   | N1              | 1.3342(17) |
| N1   | N2              | 1.3351(18) |
| N1   | C2              | 1.3435(19) |
| N2   | N3              | 1.3104(19) |
| N3   | N4              | 1.3490(18) |
| N4   | C2              | 1.332(2)   |
| C1   | C1 <sup>1</sup> | 1.328(3)   |
| C1   | C2              | 1.446(2)   |
| O2   | N5              | 1.4194(17) |

<sup>1</sup>1-x,1-y,2-z

**Table S17:** Bond Angles in ° for **9**.

| Atom            | Atom | Atom | Angle/°    |
|-----------------|------|------|------------|
| O1              | N1   | N2   | 121.18(12) |
| O1              | N1   | C2   | 128.83(13) |
| N2              | N1   | C2   | 109.99(13) |
| N3              | N2   | N1   | 105.22(12) |
| N2              | N3   | N4   | 111.54(12) |
| C2              | N4   | N3   | 105.81(12) |
| C1 <sup>1</sup> | C1   | C2   | 121.75(19) |
| N1              | C2   | C1   | 124.01(14) |
| N4              | C2   | N1   | 107.44(13) |
| N4              | C2   | C1   | 128.56(13) |

<sup>1</sup>1-x,1-y,2-z

**Table S18:** Torsion Angles in ° for **9**.

| Atom            | Atom | Atom | Atom | Angle/°     |
|-----------------|------|------|------|-------------|
| O1              | N1   | N2   | N3   | 179.11(12)  |
| O1              | N1   | C2   | N4   | -178.89(13) |
| O1              | N1   | C2   | C1   | 1.5(2)      |
| N1              | N2   | N3   | N4   | -0.07(16)   |
| N2              | N1   | C2   | N4   | 0.27(16)    |
| N2              | N1   | C2   | C1   | -179.33(13) |
| N2              | N3   | N4   | C2   | 0.24(16)    |
| N3              | N4   | C2   | N1   | -0.30(16)   |
| N3              | N4   | C2   | C1   | 179.27(14)  |
| C1 <sup>1</sup> | C1   | C2   | N1   | -167.11(18) |
| C1 <sup>1</sup> | C1   | C2   | N4   | 13.4(3)     |
| C2              | N1   | N2   | N3   | -0.12(16)   |

<sup>1</sup>1-x,1-y,2-z

**Table S19:** Hydrogen Fractional Atomic Coordinates ( $\times 10^4$ ) and Equivalent Isotropic Displacement Parameters ( $\text{\AA}^2 \times 10^3$ ) for **9**.  $U_{eq}$  is defined as 1/3 of the trace of the orthogonalised  $U_{ij}$ .

| Atom | x         | y        | z         | $U_{eq}$ |
|------|-----------|----------|-----------|----------|
| H1   | 7000(30)  | 5275(17) | 10040(30) | 20(4)    |
| H2   | 9380(40)  | 4530(30) | 7600(40)  | 57(7)    |
| H5A  | 10200(30) | 2220(20) | 6860(30)  | 38(6)    |
| H5B  | 8300(30)  | 2845(19) | 6120(30)  | 26(5)    |
| H5C  | 10220(30) | 3310(20) | 5480(30)  | 37(6)    |



**Table S20:** Hydrogen Bond information for **9**.

| <b>D</b> | <b>H</b> | <b>A</b>        | <b>d(D-H)/Å</b> | <b>d(H-A)/Å</b> | <b>d(D-A)/Å</b> | <b>D-H-A/deg</b> |
|----------|----------|-----------------|-----------------|-----------------|-----------------|------------------|
| O2       | H2       | O1              | 0.93(3)         | 1.69(3)         | 2.6219(15)      | 178(2)           |
| N5       | H5A      | O1 <sup>1</sup> | 0.94(3)         | 1.82(3)         | 2.7418(18)      | 166(2)           |
| N5       | H5B      | N3 <sup>2</sup> | 0.92(2)         | 1.96(2)         | 2.8161(19)      | 153.6(18)        |
| N5       | H5C      | O1 <sup>3</sup> | 0.90(2)         | 1.95(2)         | 2.8493(17)      | 174(2)           |

<sup>1</sup>2-x,-1/2+y,3/2-z; <sup>2</sup>1-x,1-y,1-z; <sup>3</sup>2-x,1-y,1-z
